# Supplementary material for: The impact of routine data quality assessments on electronic medical record data quality in Kenya
Source: PubMed Central journal article supplement (PMC5905951; doi:10.1371/journal.pone.0195362), 2018-04-18
Supplement: pone.0195362.s001.pdf [file pone.0195362.s001.pdf]

**Table S1. Frequency of missing data for each data element**

|                                    | Paper record |           | KenyaEMR  |           |
|------------------------------------|--------------|-----------|-----------|-----------|
|                                    | Baseline     | Follow-up | Baseline  | Follow-up |
|                                    | n (%)        | n (%)     | n (%)     | n (%)     |
|                                    | N=2369       | N=2355    | N=2369    | N=2355    |
| <b>Mandatory data elements</b>     |              |           |           |           |
| Patient ID*                        | 30 (1)       | 45 (2)    | 134 (6)   | 1 (0)     |
| Sex*                               | 41 (2)       | 295 (13)  | 127 (5)   | 0 (0)     |
| Date of birth*                     | 206 (9)      | 359 (15)  | 133 (6)   | 0 (0)     |
| Enrollment date*                   | 230 (10)     | 405 (17)  | 238 (10)  | 0 (0)     |
| Enrollment program*                | 24 (1)       | 156 (7)   | 174 (7)   | 0 (0)     |
| Entry point*                       | 285 (12)     | 468 (20)  | 329 (14)  | 165 (7)   |
| Last visit date*                   | 162 (7)      | 313 (13)  | 216 (9)   | 1 (0)     |
| Next visit date*                   | 159 (7)      | 456 (19)  | 324 (14)  | 184 (8)   |
| Number of clinic visits*           | 51 (2)       | 124 (5)   | 249 (11)  | 1 (0)     |
| 1 <sup>st</sup> CD4 count          | 720 (30)     | 809 (34)  | 1027 (43) | 670 (28)  |
| 1 <sup>st</sup> CD4 date           | 1098 (46)    | 836 (35)  | 1251 (53) | 670 (28)  |
| Last CD4 count                     | 691 (29)     | 887 (38)  | 742 (31)  | 670 (28)  |
| Last CD4 date                      | 1172 (49)    | 889 (38)  | 1236 (52) | 670 (28)  |
| 1 <sup>st</sup> WHO stage          | 451 (19)     | 561 (24)  | 894 (38)  | 322 (14)  |
| 1 <sup>st</sup> WHO date           | 968 (41)     | 578 (25)  | 1183 (50) | 308 (13)  |
| Last WHO stage                     | 536 (23)     | 553 (23)  | 497 (21)  | 314 (13)  |
| Last WHO date                      | 1016 (43)    | 551 (23)  | 1000 (42) | 302 (13)  |
| Last CTX date                      | 237 (10)     | 350 (15)  | 295 (12)  | 160 (7)   |
| <b>Non-mandatory data elements</b> |              |           |           |           |
| ART start date                     | 752 (32)     | 876 (37)  | 789 (33)  | 732 (31)  |
| ART regimen                        | 623 (26)     | 806 (34)  | 789 (33)  | 738 (31)  |
| Weight (at ART initiation)         | 975 (41)     | 1157 (49) | 1434 (61) | 1749 (74) |
| Transfer in date                   | 2026 (86)    | 2092 (89) | 2221 (94) | 2032 (86) |
| Transfer out date                  | 2255 (95)    | 2210 (94) | 2247 (95) | 2249 (95) |
| Death date                         | 2333 (98)    | 2283 (97) | 2241 (95) | 2237 (95) |

\* The nine data elements that should have been completed for all individuals, regardless of clinical practice. The proportion of records with a missing value for any of the nine data elements was assessed.
