# Supplementary material for: The impact of routine data quality assessments on electronic medical record data quality in Kenya
Source: PubMed Central journal article supplement (PMC5905951; doi:10.1371/journal.pone.0195362), 2018-04-18
Supplement: pone.0195362.s002.pdf [file pone.0195362.s002.pdf]

**Table S2. Frequency of concordant data for each data element**

|                                                | Discordant values           |                              | Concordant values           |                              |                             |                              |
|------------------------------------------------|-----------------------------|------------------------------|-----------------------------|------------------------------|-----------------------------|------------------------------|
|                                                | Baseline<br>n (%)<br>N=2369 | Follow-up<br>n (%)<br>N=2355 | Data element value missing  |                              | Data element populated      |                              |
|                                                |                             |                              | Baseline<br>n (%)<br>N=2369 | Follow-up<br>n (%)<br>N=2355 | Baseline<br>n (%)<br>N=2369 | Follow-up<br>n (%)<br>N=2355 |
| <b>Mandatory data element</b>                  |                             |                              |                             |                              |                             |                              |
| Patient ID                                     | 1326 (56)                   | 161 (7)                      | 4 (0)                       | 1 (0)                        | 1039 (44)                   | 2193 (93)                    |
| Sex                                            | 341 (14)                    | 386 (16)                     | 3 (0)                       | 0 (0)                        | 2025 (85)                   | 1969 (84)                    |
| Date of birth                                  | 1237 (52)                   | 1015 (43)                    | 13 (1)                      | 0 (0)                        | 1119 (47)                   | 1340 (57)                    |
| Enrollment date                                | 1180 (50)                   | 1013 (43)                    | 45 (2)                      | 0 (0)                        | 1144 (48)                   | 1342 (57)                    |
| Enrollment program                             | 462 (20)                    | 257 (11)                     | 3 (0)                       | 0 (0)                        | 1904 (80)                   | 2098 (89)                    |
| Entry point                                    | 1385 (58)                   | 862 (37)                     | 92 (4)                      | 74 (3)                       | 892 (38)                    | 1419 (60)                    |
| Last visit date                                | 1327 (56)                   | 1211 (51)                    | 30 (1)                      | 0 (0)                        | 1012 (43)                   | 1144 (49)                    |
| Next visit date                                | 1307 (55)                   | 958 (41)                     | 78 (3)                      | 127 (5)                      | 984 (42)                    | 1270 (54)                    |
| Number of clinic visits                        | 1731 (73)                   | 1591 (68)                    | 12 (1)                      | 0 (0)                        | 626 (26)                    | 764 (32)                     |
| 1 <sup>st</sup> CD4 count                      | 1126 (48)                   | 933 (40)                     | 562 (24)                    | 503 (21)                     | 681 (29)                    | 919 (39)                     |
| 1 <sup>st</sup> CD4 date*                      | 1082 (46)                   | 1379 (59)                    | 972 (41)                    | 509 (22)                     | 315 (13)                    | 467 (20)                     |
| Last CD4 count                                 | 1224 (52)                   | 973 (41)                     | 430 (18)                    | 530 (23)                     | 715 (30)                    | 852 (36)                     |
| Last CD4 date*                                 | 1101 (46)                   | 1353 (57)                    | 1002 (42)                   | 531 (23)                     | 266 (11)                    | 471 (20)                     |
| 1 <sup>st</sup> WHO stage                      | 1162 (49)                   | 984 (42)                     | 270 (11)                    | 174 (7)                      | 937 (40)                    | 1197 (51)                    |
| 1 <sup>st</sup> WHO date*                      | 961 (41)                    | 1432 (61)                    | 836 (35)                    | 179 (8)                      | 572 (24)                    | 744 (32)                     |
| Last WHO stage                                 | 853 (36)                    | 712 (30)                     | 302 (13)                    | 201 (9)                      | 1214 (51)                   | 1442 (61)                    |
| Last WHO date*                                 | 958 (40)                    | 1162 (49)                    | 859 (36)                    | 199 (8)                      | 552 (23)                    | 994 (42)                     |
| Last CTX date                                  | 1320 (56)                   | 1147 (49)                    | 74 (3)                      | 76 (3)                       | 975 (41)                    | 1132 (48)                    |
| <b>Non-mandatory data elements<sup>1</sup></b> |                             |                              |                             |                              |                             |                              |
| ART start date                                 | 927 (39)                    | 731 (31)                     | 546 (23)                    | 608 (26)                     | 896 (38)                    | 1016 (43)                    |
| ART regimen                                    | 706 (30)                    | 582 (25)                     | 527 (22)                    | 603 (26)                     | 1136 (48)                   | 1170 (50)                    |
| Weight (at ART start)                          | 1068 (45)                   | 986 (42)                     | 795 (34)                    | 1023 (43)                    | 506 (21)                    | 346 (15)                     |
| Transfer in date                               | 321 (14)                    | 207 (9)                      | 1973 (83)                   | 1975 (84)                    | 75 (3)                      | 173 (7)                      |
| Transfer out date                              | 169 (7)                     | 150 (6)                      | 2176 (92)                   | 2160 (92)                    | 24 (1)                      | 45 (2)                       |
| Death date                                     | 127 (5)                     | 104 (4)                      | 2227 (94)                   | 2213 (94)                    | 15 (1)                      | 38 (2)                       |

\* Data elements not included in the concordance score.
